# Supplementary material for: BIN1 Localizes the L-Type Calcium Channel to Cardiac T-Tubules
Source: PLOS journal article supplement (doi:10.1371/journal.pbio.1000312), 2010-02-15

## Human Cardiomyocytes

**BIN1**

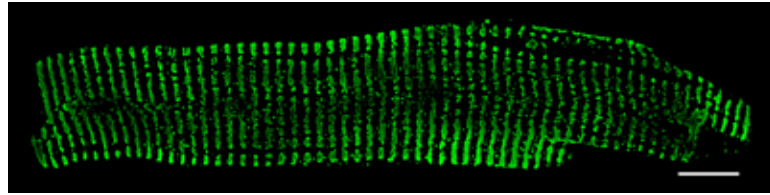

**Cav 1.2**

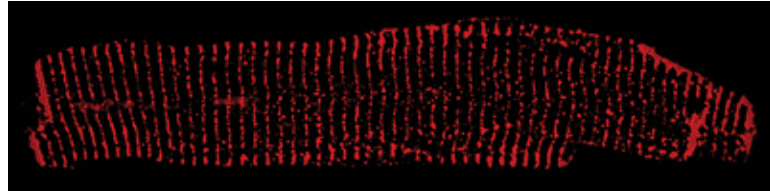

**Merged**

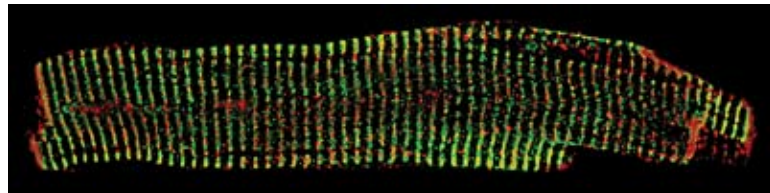

## Mouse Cardiomyocytes

**BIN1**

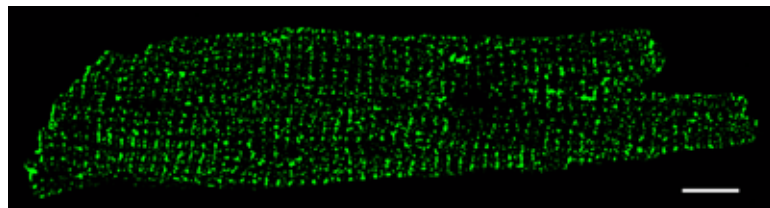

**Cav 1.2**

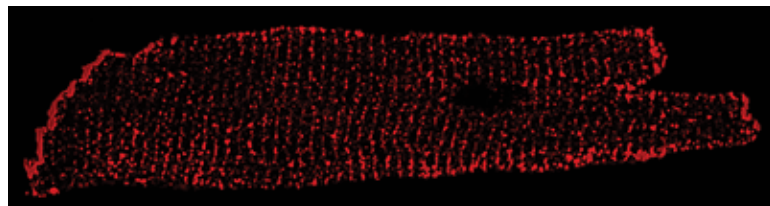

**Merged**

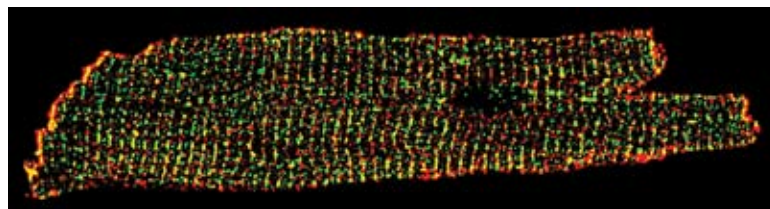

Supplement: S3 (10.1371/journal.pbio.1000312.s003) [file journal.pbio.1000312.s003]
